# Supplementary material
Source: Springer Nature journal article supplement (https://www.springermedizin.de/resource/supplementary/12979_2014_192_MOESM7_ESM.pdf/9603146)

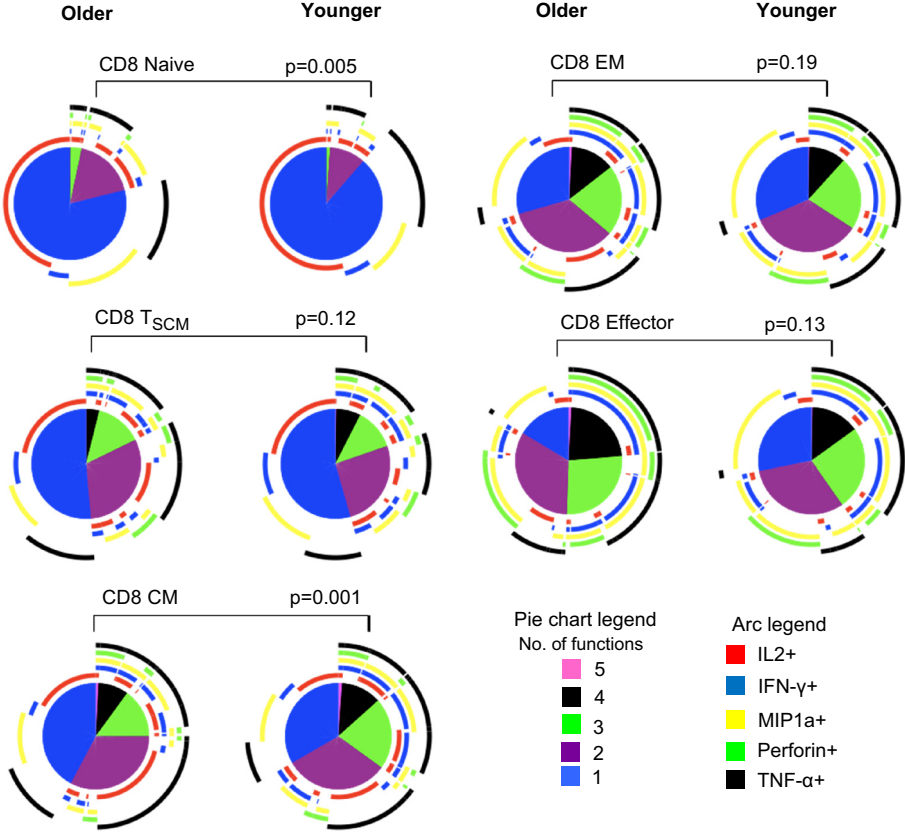

Supplement: MOESM7 [file 9603146]
